# Supplementary material for: More electron rich than cyclopentadienyl: 1,2-diaza-3,5-diborolyl as a ligand in ferrocene and ruthenocene analogs
Source: Royal Society of Chemistry journal article supplement (doi:10.1039/c1cc12281a), 2011-01-01
Supplement: c1cc12281a.pdf [file c1cc12281a.pdf]

# More Electron Rich than Cyclopentadienyl: 1,2-Diaza-3,5-diborolyl as a Ligand in Ferrocene and Ruthenocene Analogs

*Hanh V. Ly,<sup>†</sup> Heikki M. Tuononen,<sup>‡</sup> Masood Parvez,<sup>†</sup> and Roland Roesler<sup>\*†</sup>*

Department of Chemistry, University of Calgary, 2500 University Drive NW, Calgary, AB, T2N 1N4  
Canada and Department of Chemistry, University of Jyväskylä, P.O. Box 35, FIN-40014 Jyväskylä,  
Finland

roesler@ucalgary.ca

## - Supplementary Information -

| <b>Topic</b>                                                                                                            | <b>Page</b> |
|-------------------------------------------------------------------------------------------------------------------------|-------------|
| Synthetic procedures.....                                                                                               | 2           |
| Cyclovoltammetry data for <b>3</b> and <b>4</b> .....                                                                   | 5           |
| Crystallographic data for <b>3</b> and <b>4</b> .....                                                                   | 8           |
| <sup>1</sup> H, <sup>13</sup> C and <sup>11</sup> B NMR Spectra for <b>1</b> , <b>2</b> , <b>3</b> , and <b>4</b> ..... | 11          |
| Computational Details for <b>3</b> and <b>4</b> .....                                                                   | 19          |

## Experimental Section

**General Considerations.** All operations were performed under an argon atmosphere using standard Schlenk and glove box techniques. Solvents were dried and deoxygenated prior to use. Pyrazolidine hydrochloride,<sup>1</sup> as well as [Cp\**RuCl*]<sub>4</sub><sup>2</sup> and FeCl<sub>2</sub>(thf)<sub>2</sub><sup>3</sup> were prepared according to reported procedures. NMR spectra were recorded on Bruker Advance DRX-400 and AMX-300 spectrometers and calibrated with respect to C<sub>6</sub>D<sub>5</sub>H (<sup>1</sup>H, 7.15 ppm), THF-d<sub>7</sub> (<sup>1</sup>H, 3.58 ppm), C<sub>6</sub>D<sub>6</sub> (<sup>13</sup>C, 128.39 ppm), THF-d<sub>8</sub> (<sup>13</sup>C, 67.57 ppm) and BF<sub>3</sub>·Et<sub>2</sub>O (<sup>11</sup>B, 0 ppm). The electron impact (EI), electrospray ionization (ESI) and high-resolution mass spectrometry (HRMS) were performed by the Analytical Instrumentation Laboratory, Department of Chemistry, University of Calgary.

**4-Methyl-3,5-diphenyl-1,2-pyrazo-3,5-diborolidine (1).** A colorless solution of potassium bis(trimethylsilyl)amide (2.987 g, 14.97 mmol) in THF (20 mL) was slowly added to a stirred suspension of pyrazolidine hydrochloride<sup>1</sup> (1.086 g, 7.488 mmol) in THF (30 mL). The mixture was stirred at room temperature overnight and subsequently triethylamine (1.515 g, 14.97 mmol) was added, followed by a solution of 1,1-bis(chlorophenylboryl)ethane (2.058 g, 7.488 mmol) in hexane (20 mL). The yellow suspension was stirred at room temperature for 5 h and the resulting white precipitate was filtered off. Volatiles were removed under full vacuum and the pale yellow residue was washed a few times with pentane (25 mL), yielding **1** as a colorless solid (1.605 g, 71 %). <sup>1</sup>H NMR (400 MHz, C<sub>6</sub>D<sub>6</sub>, 25 °C): δ = 1.44 (d, 3H, <sup>3</sup>J<sub>HH</sub> = 8.4 Hz, HCCH<sub>3</sub>), 1.55 (m, 2H, NCH<sub>2</sub>CH<sub>2</sub>), 1.73 (q, 1H, <sup>3</sup>J<sub>HH</sub> = 8.4 Hz, HCCH<sub>3</sub>), 3.21 (m, 4H, NCH<sub>2</sub>CH<sub>2</sub>), 7.31 (t, 2H, <sup>3</sup>J<sub>HH</sub> = 7.5 Hz, *p*-C<sub>6</sub>H<sub>5</sub>), 7.40 (t, 4H, <sup>3</sup>J<sub>HH</sub> = 7.5 Hz, *m*-C<sub>6</sub>H<sub>5</sub>), 7.77 (d, 4H, <sup>3</sup>J<sub>HH</sub> = 7.5 Hz, *o*-C<sub>6</sub>H<sub>5</sub>); <sup>13</sup>C NMR (100 MHz, C<sub>6</sub>D<sub>6</sub>, 25 °C): δ = 11.7 (s, HCCH<sub>3</sub>), 22.5 (s, br, HCCH<sub>3</sub>), 30.9 (s, NCH<sub>2</sub>CH<sub>2</sub>), 44.2 (s, NCH<sub>2</sub>CH<sub>2</sub>), 128.6 (s, *m*-C<sub>6</sub>H<sub>5</sub>), 129.3 (s, *p*-C<sub>6</sub>H<sub>5</sub>), 134.9 (s, *o*-C<sub>6</sub>H<sub>5</sub>), 137.6 (s, br, *i*-C<sub>6</sub>H<sub>5</sub>); <sup>11</sup>B NMR (128 MHz, THF-d<sub>8</sub>, 25 °C): δ = 39.3 (s, br); EI<sup>+</sup>-MS (70 eV): m/z(%): 274(45) [M]<sup>+</sup>; HRMS for H<sub>20</sub>C<sub>17</sub>N<sub>2</sub><sup>11</sup>B<sub>2</sub> calcd. 274.18126, found 274.18256; Anal. Calcd for H<sub>20</sub>C<sub>17</sub>N<sub>2</sub>B<sub>2</sub>: C, 74.53; H, 7.36; N, 10.22. Found: C, 74.02; H, 7.55; N, 10.13.

**4-Methyl-3,5-diphenyl-1,2-pyrazo-3,5-diborolyllithium (2).** A yellow solution of lithium 2,2,6,6-tetramethylpiperidide was formed by mixing the 1.6 M *n*BuLi in hexane (2.52 mL, 4.03 mmol) with tetramethylpiperidine (570 mg, 4.03 mmol) in THF (3 mL). This solution was cooled to -35 °C and added to a pre-cooled solution of **1** (1.10 g, 4.03 mmol) in THF (10 mL). The orange mixture was kept at low temperature for 1 h and then stirred at room temperature for 2 h. The solvent was removed in vacuum leaving behind a pale yellow residue, which was washed with hexane (30 mL) and dried under vacuum. The product was obtained as a colorless powder (1.02 g, 91 %). <sup>1</sup>H NMR (400 MHz, THF-d<sub>8</sub>, 25 °C): δ = 2.18 (quint, 2H, <sup>3</sup>J<sub>HH</sub> = 6.4 Hz, NCH<sub>2</sub>CH<sub>2</sub>), 2.23 (s, 3H, CCH<sub>3</sub>), 3.63 (t, 4H, <sup>3</sup>J<sub>HH</sub> = 5.9 Hz, NCH<sub>2</sub>CH<sub>2</sub>), 6.99 (t, 2H, <sup>3</sup>J<sub>HH</sub> = 7.1 Hz, *p*-C<sub>6</sub>H<sub>5</sub>), 7.13 (t, 4H, <sup>3</sup>J<sub>HH</sub> = 7.3 Hz, *m*-C<sub>6</sub>H<sub>5</sub>), 7.58 (d, 4H, <sup>3</sup>J<sub>HH</sub> = 7.3 Hz, *o*-C<sub>6</sub>H<sub>5</sub>); <sup>13</sup>C NMR (100 MHz, THF-d<sub>8</sub>, 25 °C): δ = 15.7 (s, CCH<sub>3</sub>), 31.5 (s, NCH<sub>2</sub>CH<sub>2</sub>), 46.0 (s, NCH<sub>2</sub>CH<sub>2</sub>), 91.6 (s, br, B<sub>2</sub>CCH<sub>3</sub>), 125.1 (s, *p*-C<sub>6</sub>H<sub>5</sub>), 127.4 (s, *m*-C<sub>6</sub>H<sub>5</sub>), 134.7 (s, *o*-C<sub>6</sub>H<sub>5</sub>), 145.5 (s, br, *i*-C<sub>6</sub>H<sub>5</sub>); <sup>11</sup>B NMR (128 MHz, THF-d<sub>8</sub>, 25 °C): δ = 31.5 (s, br); <sup>7</sup>Li NMR (155 MHz, THF-d<sub>8</sub>, 25 °C): δ = -2.16 (s); EI<sup>+</sup>-MS (70 eV): m/z(%): 312(5) [M - Li + K]<sup>+</sup>, 274(8) [M - Li + H]<sup>+</sup>; HRMS for H<sub>20</sub>C<sub>17</sub>N<sub>2</sub><sup>11</sup>B<sub>2</sub> calcd. 274.18126, found 274.18037.

**4-Methyl-3,5-diphenyl-1,2-pyrazo-3,5-diboroly-pentamethylcyclopentadienylruthenium (3).** A solution of **2** (0.10 g, 0.36 mmol) and [Cp\**Ru*Cl]<sub>4</sub> (0.093 g, 0.089 mmol) in THF (20 mL) was stirred at -78 °C for 1 h, slowly warmed to ambient temperature and stirred for an additional 30 min. Volatiles were removed under vacuum and the dark brown solid was extracted with pentane (20 mL). LiCl was filtered off and the volatiles were removed, leaving behind the product as a light yellow solid (0.15 g, 80 %). Yellow crystals of **3** were obtained by slow evaporation of a hexane solution at ambient temperature. <sup>1</sup>H NMR (400 MHz, C<sub>6</sub>D<sub>6</sub>, 25 °C): δ = 1.34 (m, 1H, NCH<sub>2</sub>CH<sub>2</sub>), 1.51 (s, 15H, C<sub>5</sub>(CH<sub>3</sub>)<sub>5</sub>), 1.91 (m, 1H, NCH<sub>2</sub>CH<sub>2</sub>), 2.36 (s, 3H, CCH<sub>3</sub>), 2.55 (m, 2H, NCH<sub>2</sub>CH<sub>2</sub>), 3.20 (m, 2H, NCH<sub>2</sub>CH<sub>2</sub>), 7.29 (t, 2H, *p*-C<sub>6</sub>H<sub>5</sub>), 7.43 (t, 4H, *m*-C<sub>6</sub>H<sub>5</sub>), 7.78 (d, 4H, *o*-C<sub>6</sub>H<sub>5</sub>); <sup>13</sup>C{<sup>1</sup>H} NMR (100 MHz, C<sub>6</sub>D<sub>6</sub>, 25 °C): δ = 11.0 (s, C<sub>5</sub>(CH<sub>3</sub>)<sub>5</sub>), 15.9 (s, CCH<sub>3</sub>), 26.5 (s, NCH<sub>2</sub>CH<sub>2</sub>), 47.0 (s, NCH<sub>2</sub>CH<sub>2</sub>), 80.0 (s, br, B<sub>2</sub>CCH<sub>3</sub>), 81.6 (s, C<sub>5</sub>(CH<sub>3</sub>)<sub>5</sub>), 127.6 (s, *p*-C<sub>6</sub>H<sub>5</sub>), 128.1 (s, *m*-C<sub>6</sub>H<sub>5</sub>), 134.7 (s, *o*-C<sub>6</sub>H<sub>5</sub>), 139.1 (s, br, *i*-C<sub>6</sub>H<sub>5</sub>); <sup>11</sup>B{<sup>1</sup>H} NMR (128 MHz, C<sub>6</sub>D<sub>6</sub>, 25 °C): δ = 14.7 (s, br); MS (EI<sup>+</sup>, 70 eV): m/z(%): 509(100)

$[\text{Cp}^*\text{RuL}]^+$ , 495(62)  $[\text{Cp}^*\text{RuL} - \text{Me}]^+$ ; HRMS for  $\text{H}_{34}\text{C}_{27}\text{N}_2\text{Ru}^{11}\text{B}_2$  calcd. 510.19516, found 510.19853; Anal. Calcd for  $\text{H}_{34}\text{C}_{27}\text{N}_2\text{RuB}_2$ : C, 63.68; H, 6.73; N, 5.50. Found: C, 63.81; H, 6.80; N, 5.50.

**Bis(4-methyl-3,5-diphenyl-1,2-pyrazo-3,5-diboroly)iron (4).** THF (15 mL) was added to a mixture of **2** (0.10 g, 0.36 mmol) and  $\text{FeCl}_2(\text{thf})_2$  (0.048 g, 0.18 mmol) at  $-78\text{ }^\circ\text{C}$ . The red mixture was slowly warmed to ambient temperature and stirred for 2 h. Volatiles were removed under full vacuum yielded dark brown residue, which was extracted with a mixture of hexane (15 mL) and THF (5 mL). The LiCl was filtered off and the solvent was removed in vacuum, leaving behind the product as a reddish-brown solid (0.095 g, 89 %). Thin red crystals of **4** were obtained by slow evaporation of a hexane solution at ambient temperature.  $^1\text{H}$  NMR (400 MHz,  $\text{CD}_2\text{Cl}_2$ ,  $25\text{ }^\circ\text{C}$ ):  $\delta = 1.55$  (s, 3H,  $\text{CCH}_3$ ), 2.20 (m, 1H,  $\text{NCH}_2\text{CH}_2$ ), 2.36 (m, 1H,  $\text{NCH}_2\text{CH}_2$ ), 2.94 (q, br, 2H,  $\text{NCH}_2\text{CH}_2$ ), 3.75 (t, br, 2H,  $\text{NCH}_2\text{CH}_2$ ), 7.33 – 7.37 (m, 6H,  $m$ - +  $p$ - $\text{C}_6\text{H}_5$ ), 7.68 (d, br, 4H,  $o$ - $\text{C}_6\text{H}_5$ );  $^{13}\text{C}\{^1\text{H}\}$  NMR (100 MHz,  $\text{CD}_2\text{Cl}_2$ ,  $25\text{ }^\circ\text{C}$ ):  $\delta = 15.5$  (s,  $\text{CCH}_3$ ), 27.7 (s,  $\text{NCH}_2\text{CH}_2$ ), 46.2 (s,  $\text{NCH}_2\text{CH}_2$ ), 65.5 (s, br,  $\text{B}_2\text{CCH}_3$ ), 128.0 (s,  $m$ - +  $p$ - $\text{C}_6\text{H}_5$ ), 134.9 (s,  $o$ - $\text{C}_6\text{H}_5$ ), 137.9 (s, br,  $i$ - $\text{C}_6\text{H}_5$ );  $^{11}\text{B}\{^1\text{H}\}$  NMR (128 MHz,  $\text{CD}_2\text{Cl}_2$ ,  $25\text{ }^\circ\text{C}$ ):  $\delta = 13.6$  (s, br,  $\text{LW}_{1/2} = 5647\text{ Hz}$ ); MS ( $\text{EI}^+$ , 70 eV):  $m/z(\%)$ : 602(28)  $[\text{FeL}_2]^+$ , 328(10)  $[\text{FeL}]^+$ , 274(100)  $[\text{L}]^+$ ; HRMS for  $\text{H}_{38}\text{C}_{34}\text{N}_4^{11}\text{B}_4\text{Fe}$  calcd. 602.28181, found 602.28500; Anal. Calcd for  $\text{H}_{38}\text{C}_{34}\text{N}_4\text{FeB}_4$ : C, 67.86; H, 6.36; N, 9.31. Found: C, 67.48; H, 6.48; N, 9.26.

(1) Boros, E. E.; Bouvier, F.; Randhawa, S.; Rabinowitz, M. H. *J. Heterocyclic Chem.* **2001**, *38*, 613.

(2) Fagan, P. J.; Ward, M. D.; Calabrese, J. C. *J. Am. Chem. Soc.* **1989**, *111*, 1698.

(3) Ittel, S. D.; English, A. D.; Tolman, C. A.; Jesson, J. P. *Inorg. Chim. Acta.* **1979**, *33*, 101.

## Cyclic voltammetry of 3 and 4

Measurements were performed in the absence of oxygen, in anhydrous dichloromethane at an analyte concentration of 1 mM, using 0.1 M  $[n\text{Bu}_4\text{N}]\text{PF}_6$  as a supporting electrolyte. A PARstat 2273 potentiostat was used at scan rates between 50 to 500  $\text{mVs}^{-1}$ . The cell had a platinum disk working electrode, a platinum wire auxiliary electrode and a silver wire pseudo-reference electrode.  $[\text{Cp}_2\text{Co}]^{0/+1}$  with  $E = -1.34 \text{ V vs. ferrocene}$  and  $-0.88 \text{ V vs. SCE}$  in  $\text{CH}_2\text{Cl}_2$  and  $E = -1.36 \text{ V vs. ferrocene}$  and  $-0.80 \text{ V vs. SCE}$  in THF was used as an internal standard.

| Compound                                   | Reversible oxidation vs. ferrocene (V) | Reversible oxidation vs. SCE (V) |
|--------------------------------------------|----------------------------------------|----------------------------------|
| 3 in THF                                   | 0.035                                  | 0.595                            |
| 3 in $\text{CH}_2\text{Cl}_2$ <sup>a</sup> | -0.010                                 | 0.450                            |
| 4 in THF                                   | -0.530                                 | -0.030                           |
| 4 in $\text{CH}_2\text{Cl}_2$              | -0.495                                 | -0.035                           |

<sup>a</sup> Irreversible oxidation was observed at a peak potential of 1.090 V vs. Fc and 1.550 V vs. SCE.

Cyclic voltammetry of **3** in the presence of  $[\text{Cp}_2\text{Co}][\text{PF}_6]$  standard in THF at 50 mV/s

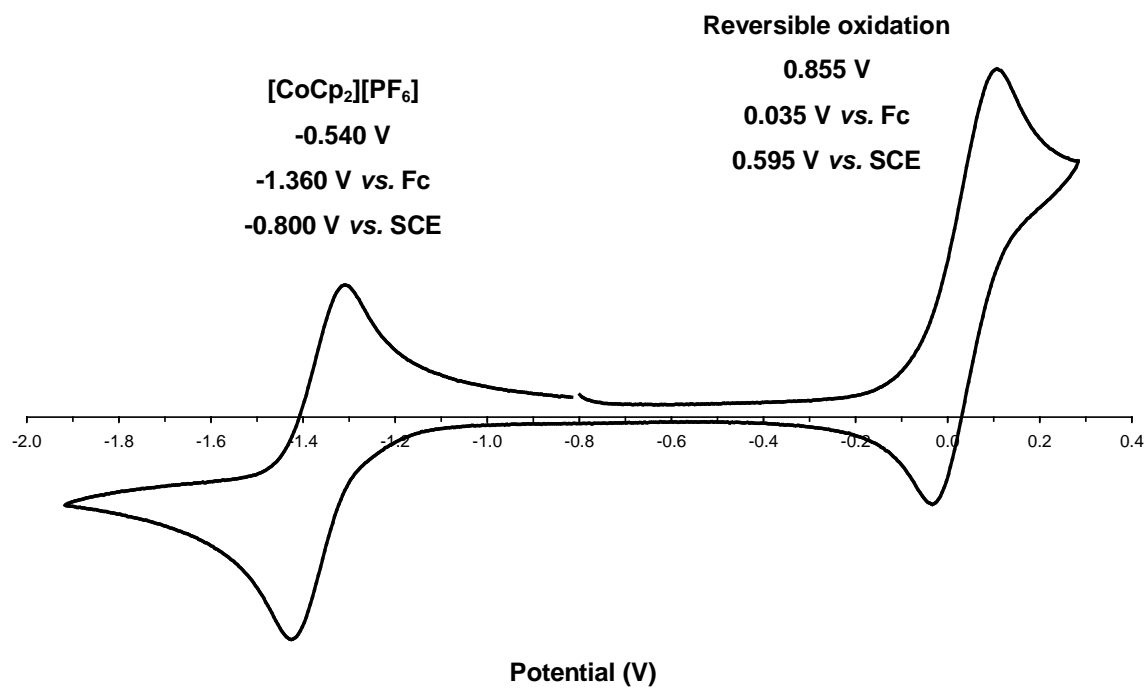

Cyclic voltammetry of **3** in the presence of  $[\text{Cp}_2\text{Co}][\text{PF}_6]$  standard in  $\text{CH}_2\text{Cl}_2$  at 50 mV/s

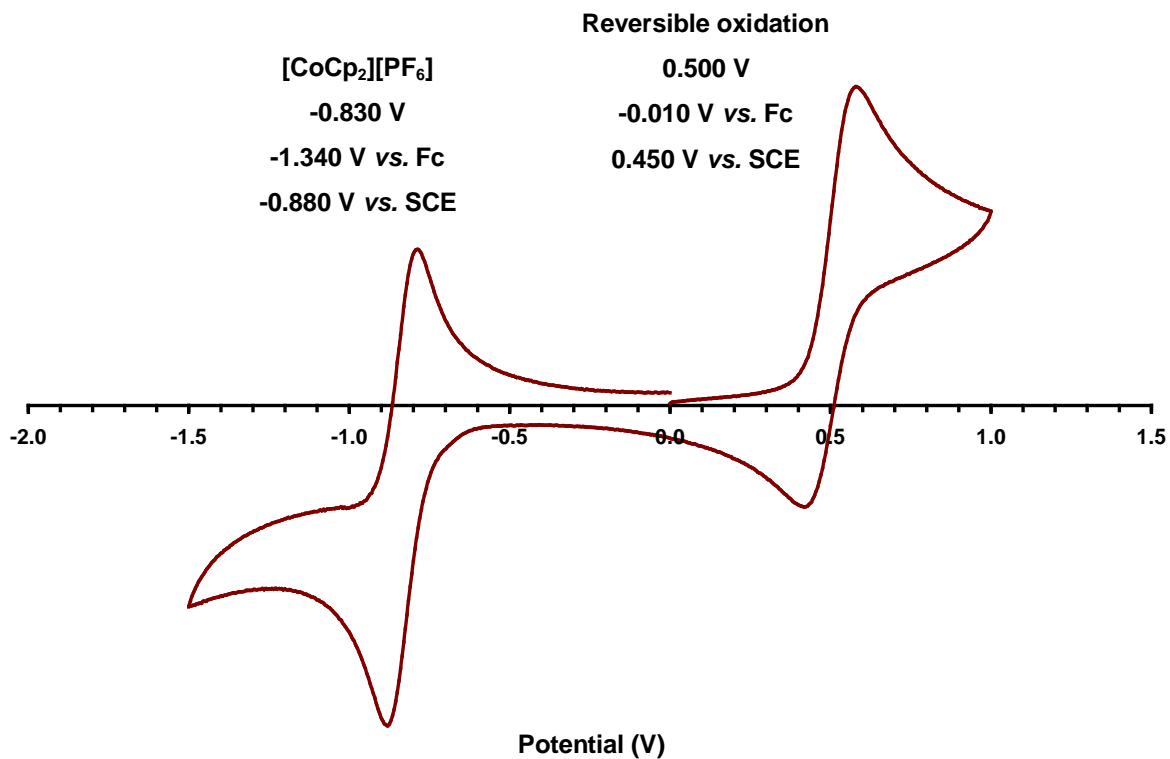

Cyclic voltammetry of **3** in CH<sub>2</sub>Cl<sub>2</sub> at 200 mV/s

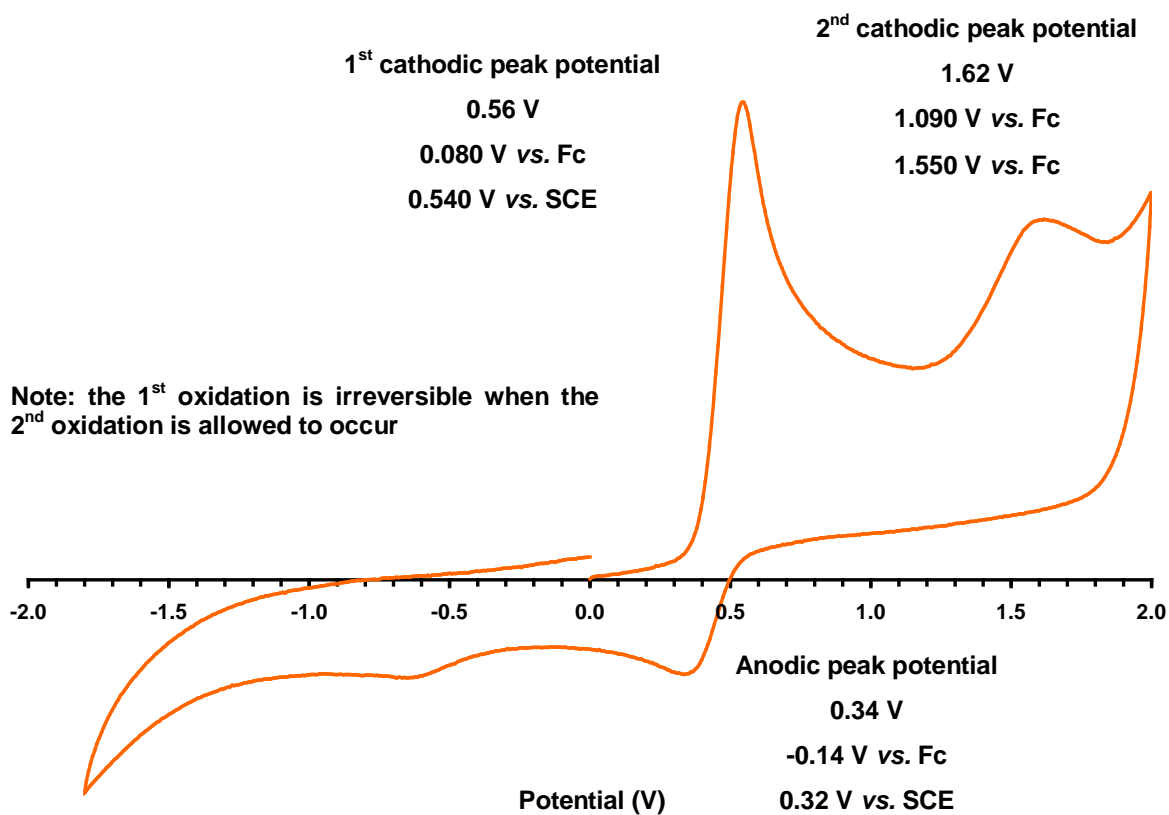

Cyclic voltammetry of **4** in the presence of [Cp<sub>2</sub>Co][PF<sub>6</sub>] standard in CH<sub>2</sub>Cl<sub>2</sub> at 50 mV/s

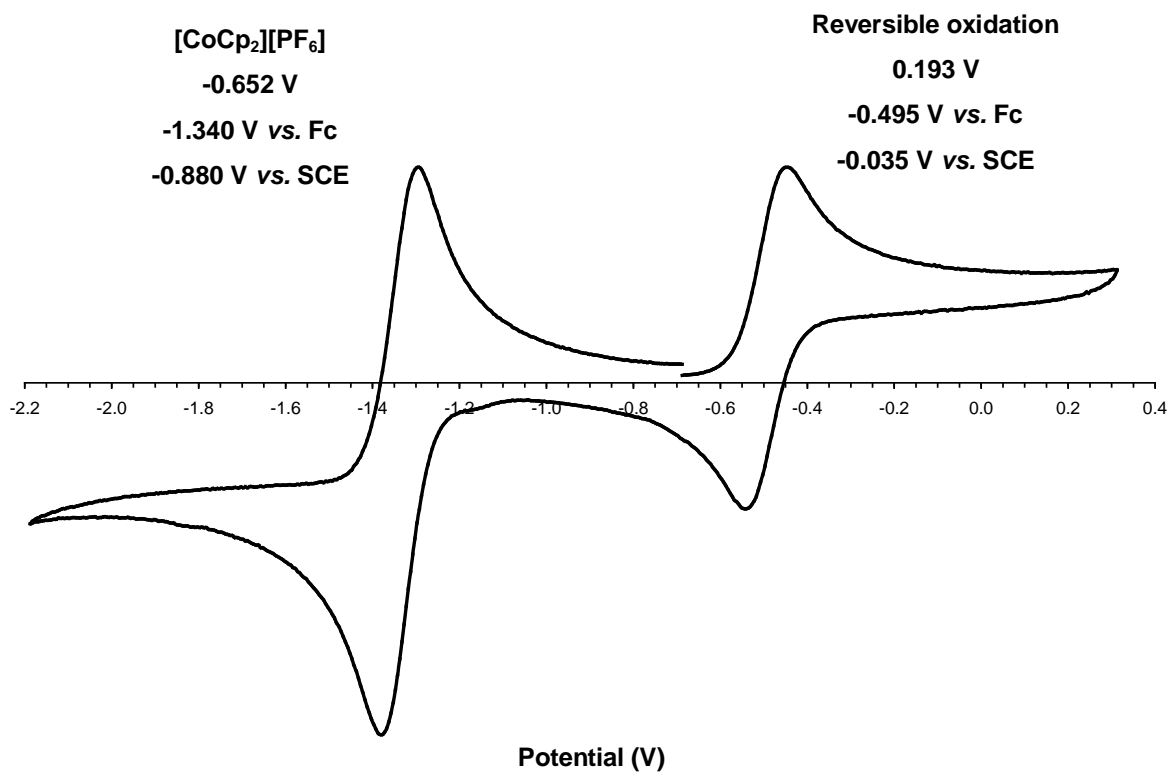

## Crystallographic details for 3 and 4

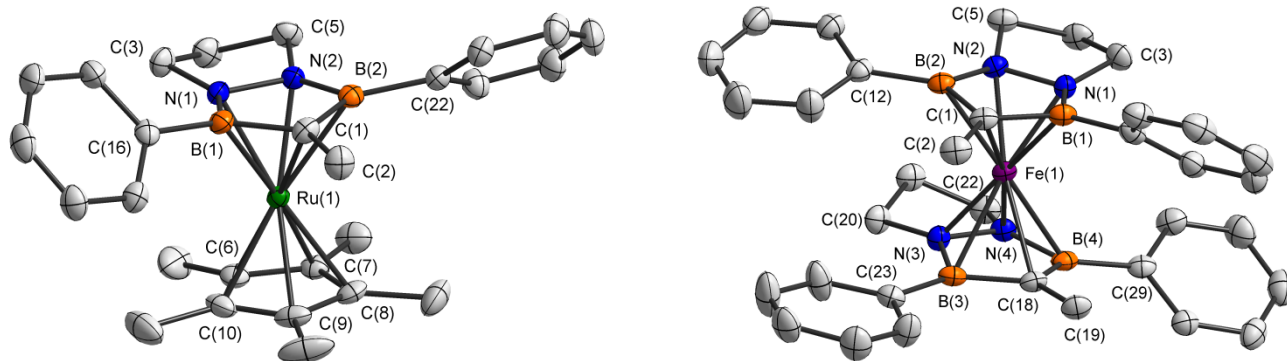

**Figure 1.** Molecular structure of **3** (left) and **4** (right) with 50 % probability level thermal ellipsoids. Hydrogen atoms have been omitted for clarity.

**Crystal structure determinations.** Data were collected at a temperature of 173(2) K using the  $\omega$  and  $\phi$  scans on a Nonius Kappa CCD diffractometer with graphite monochromated  $\text{MoK}\alpha$  radiation with  $\lambda = 0.71073 \text{ \AA}$  (Table 1), and corrected for Lorentz and polarization effects and for absorption using the multi-scan method.<sup>1</sup> The structures were solved by the direct methods<sup>2</sup> and expanded using Fourier techniques.<sup>3</sup> Non-hydrogen atoms were refined anisotropically using SHELXL97.<sup>4</sup> Hydrogen atoms were included at geometrically calculated positions during the refinement using the riding model.

(1) Otwinowski, Z.; Minor, W. *Methods Enzymol.* 1997, **276**, 307-326.

(2) Altomare, A.; Cascarano, M.; Giacovazzo, C.; Guagliardi, A. *J. Appl. Cryst.* 1993, **26**, 343-350.

(3) Beurskens, P. T.; Admiraal, G.; Beurskens, G.; Bosman, W. P.; de Gelder, R.; Israel, R.; Smits, J. M. M. The *DIRDIF-94* program system, Technical Report of the Crystallography Laboratory, 1994, University of Nijmegen, The Netherlands.

(4) Sheldrick, G. M. *Acta Cryst.* 2008, **A64**, 112-122.



**Table 1.** Selected Data and Structure Refinement Details for **3** and **4**.

|                                              | <b>3</b>                                                         | <b>4</b>                                                        |
|----------------------------------------------|------------------------------------------------------------------|-----------------------------------------------------------------|
| Empirical formula                            | C <sub>27</sub> H <sub>34</sub> B <sub>2</sub> N <sub>2</sub> Ru | C <sub>34</sub> H <sub>38</sub> B <sub>4</sub> FeN <sub>4</sub> |
| Formula weight                               | 509.25                                                           | 601.77                                                          |
| Crystal system                               | monoclinic                                                       | monoclinic                                                      |
| Space group                                  | <i>P2<sub>1</sub>/c</i>                                          | <i>P2<sub>1</sub>/c</i>                                         |
| a (Å)                                        | 12.180(3)                                                        | 11.770(5)                                                       |
| b (Å)                                        | 8.6670(11)                                                       | 15.036(3)                                                       |
| c (Å)                                        | 24.155(6)                                                        | 17.927(7)                                                       |
| β (deg)                                      | 101.776(11)                                                      | 105.487(14)                                                     |
| V (Å <sup>3</sup> )                          | 2496.2(9)                                                        | 3057.4(19)                                                      |
| Z                                            | 4                                                                | 4                                                               |
| d <sub>calc</sub> (g cm <sup>-3</sup> )      | 1.355                                                            | 1.307                                                           |
| 2θ <sub>max</sub> (deg)                      | 54.96                                                            | 54.92                                                           |
| μ(Mo Kα)(mm <sup>-1</sup> )                  | 0.645                                                            | 0.525                                                           |
| Independent reflections                      | 5685 (R <sub>int</sub> = 0.0322)                                 | 6954 (R <sub>int</sub> = 0.0437)                                |
| Data/restraints/parameters                   | 5685 / 0 / 294                                                   | 6954 / 0 / 390                                                  |
| GOF on F <sup>2</sup>                        | 1.039                                                            | 1.031                                                           |
| R <sub>1</sub> (F) [I > 2σ(I)]               | 0.0342                                                           | 0.0477                                                          |
| wR <sub>2</sub> (F <sup>2</sup> ) [all data] | 0.0884                                                           | 0.1176                                                          |

**Table 2.** Selected Bond Lengths (Å) and Angles (deg) for metallocenes **3** and **4**

|                                          | <b>3</b> (M = Ru)      | <b>4</b> (M = Fe)       |
|------------------------------------------|------------------------|-------------------------|
| B-C <sub>intra</sub> <sup>a</sup>        | 1.511(4), 1.522(4)     | 1.510(4) – 1.521(4)     |
| N-B                                      | 1.479(3), 1.487(3)     | 1.472(3) – 1.489(4)     |
| N-N                                      | 1.431(3)               | 1.436(3), 1.439(3)      |
| C <sub>extra</sub> -C <sub>intra</sub>   | 1.516(3)               | 1.513(3), 1.520(3)      |
| B-C <sub>extra</sub>                     | 1.573(4), 1.58(4)      | 1.568(4) – 1.572(4)     |
| N-C <sub>extra</sub>                     | 1.468(3), 1.469(3)     | 1.469(3) – 1.478(3)     |
| M-C <sub>intra</sub>                     | 2.296(2)               | 2.177(2), 2.192(2)      |
| M-B                                      | 2.322(3), 2.323(3)     | 2.198(3) – 2.217(3)     |
| M-N                                      | 2.1260(19), 2.1274(19) | 1.971(2) – 1.9965(19)   |
| B-C <sub>intra</sub> -B                  | 109.2(2)               | 109.5(2), 109.6(2)      |
| B-C <sub>intra</sub> -C <sub>extra</sub> | 125.1(2), 125.5(2)     | 122.9(2) – 127.5(2)     |
| N-B-C <sub>intra</sub>                   | 104.5(2), 104.5(2)     | 103.8(2) – 104.6(2)     |
| C <sub>intra</sub> -B-C <sub>extra</sub> | 133.6(2), 133.8(2)     | 132.6(2) – 133.9(2)     |
| N-B-C <sub>extra</sub>                   | 121.6(2), 121.9(2)     | 121.6(2) – 122.8(2)     |
| B-N-N                                    | 110.45(17), 110.67(18) | 110.00(19) – 110.95(19) |
| B-N-C <sub>extra</sub>                   | 138.9(2), 139.2(2)     | 137.0(2) – 138.9(2)     |
| N-N-C <sub>extra</sub>                   | 108.94(18), 109.03(18) | 108.66(18) – 109.68(18) |
| Σ <sub>pentagon angles</sub>             | 539.3                  | 538.8, 539.4            |

<sup>a</sup> C<sub>intra</sub> and C<sub>extra</sub> indicate carbon atoms that are part of the ring (intraannular) and directly connected to the ring (extraannular), respectively.

$^1\text{H}$  NMR Spectrum of the 1,2-Pyrazo-3,5-diborolidine (**1**) in  $\text{C}_6\text{D}_6$

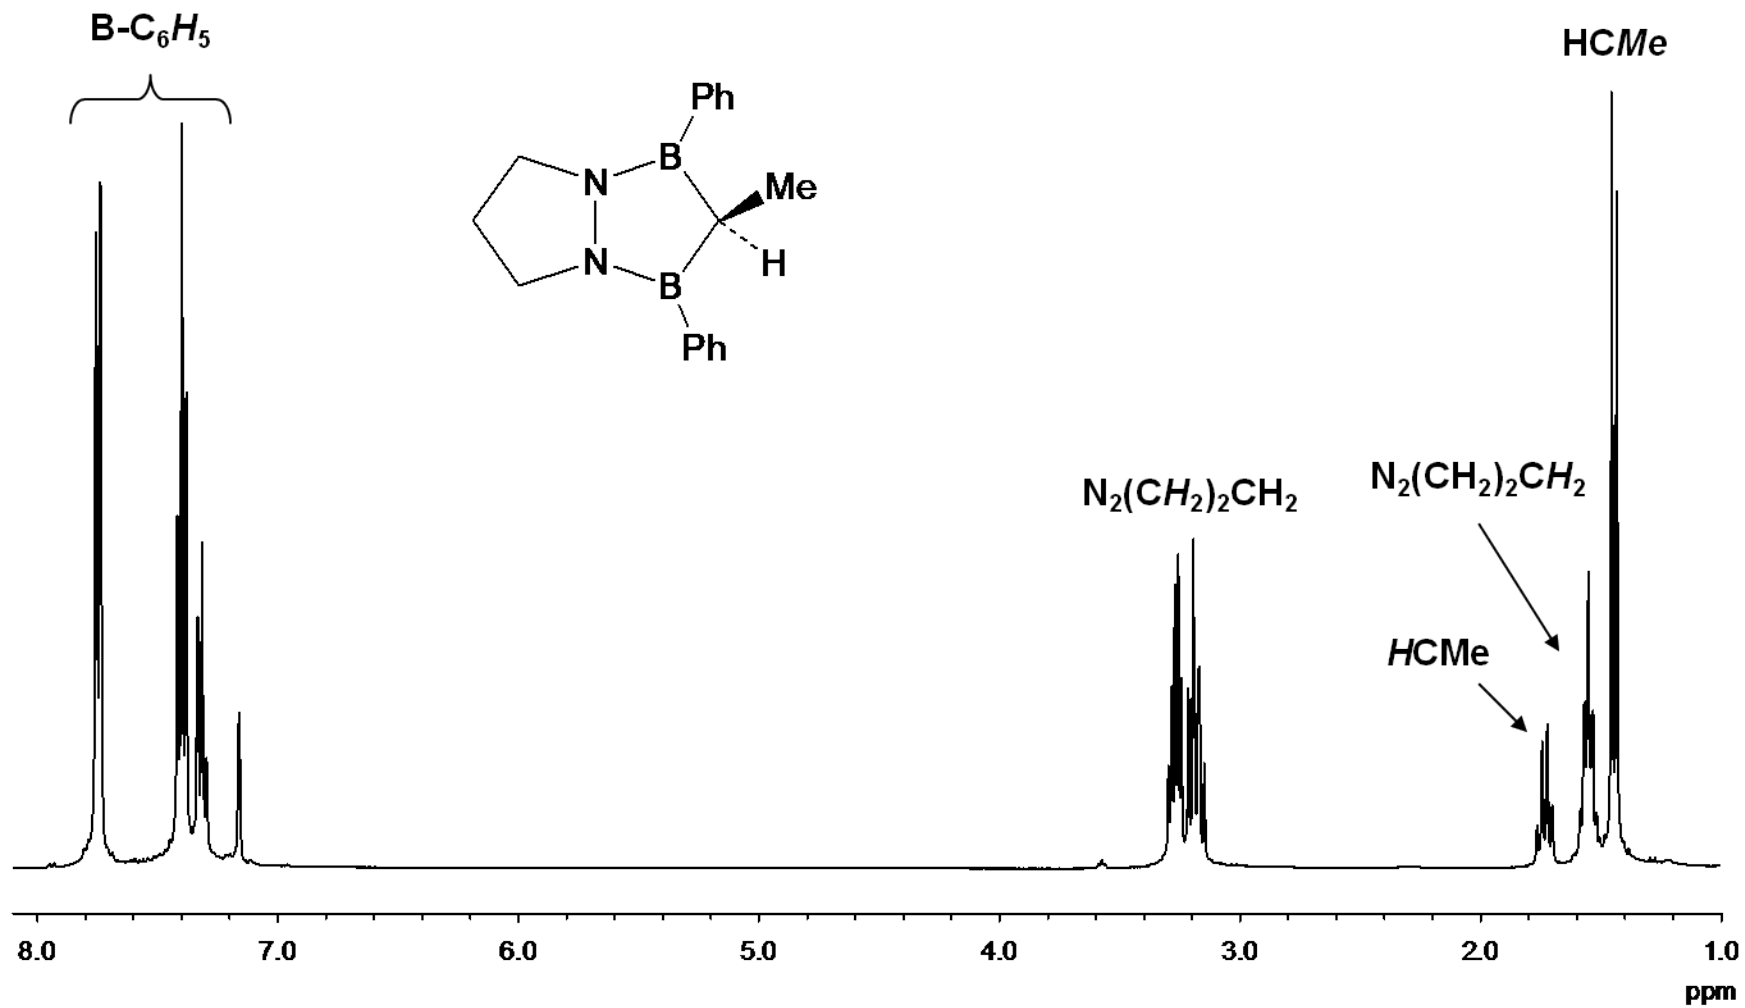

$^{13}\text{C}$  and  $^{11}\text{B}$  NMR Spectra of the 1,2-Pyrazo-3,5-diborolidine (**1**) in  $\text{C}_6\text{D}_6$

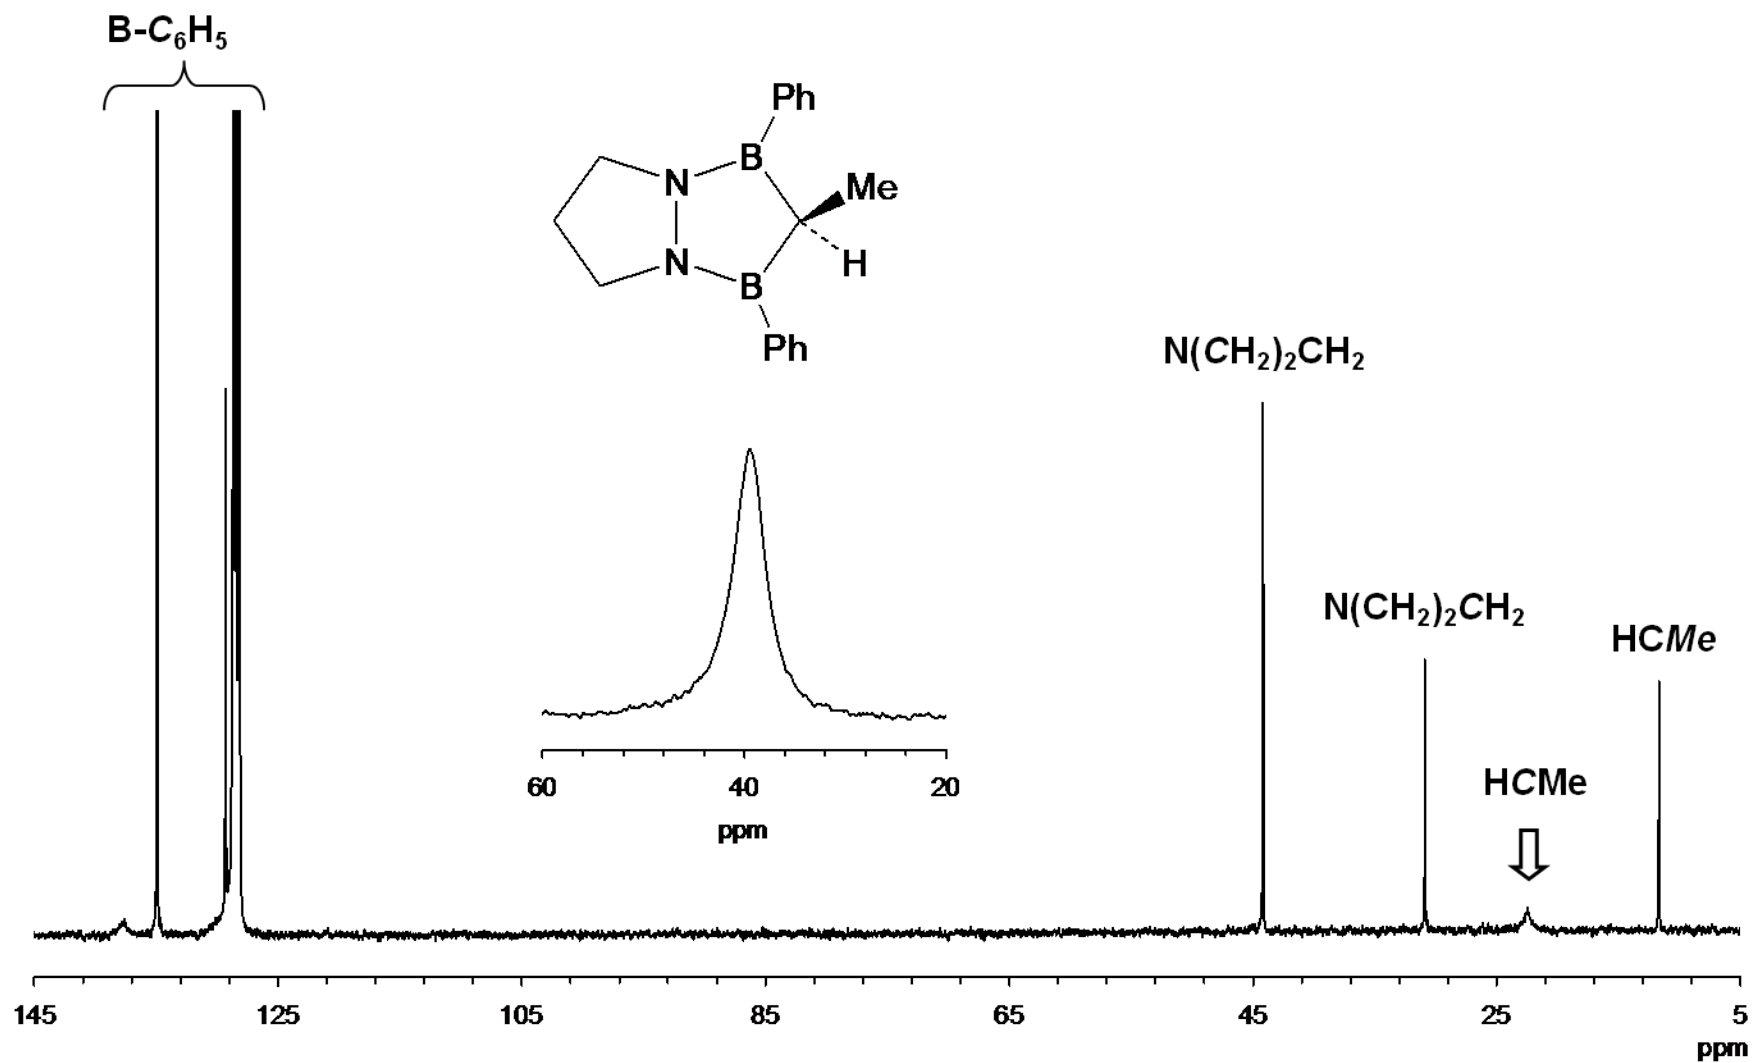

# $^1\text{H}$ and $^7\text{Li}$ NMR Spectra of the 1,2-Pyrazo-3,5-diborolyllithium (**2**) in THF- $d_8$

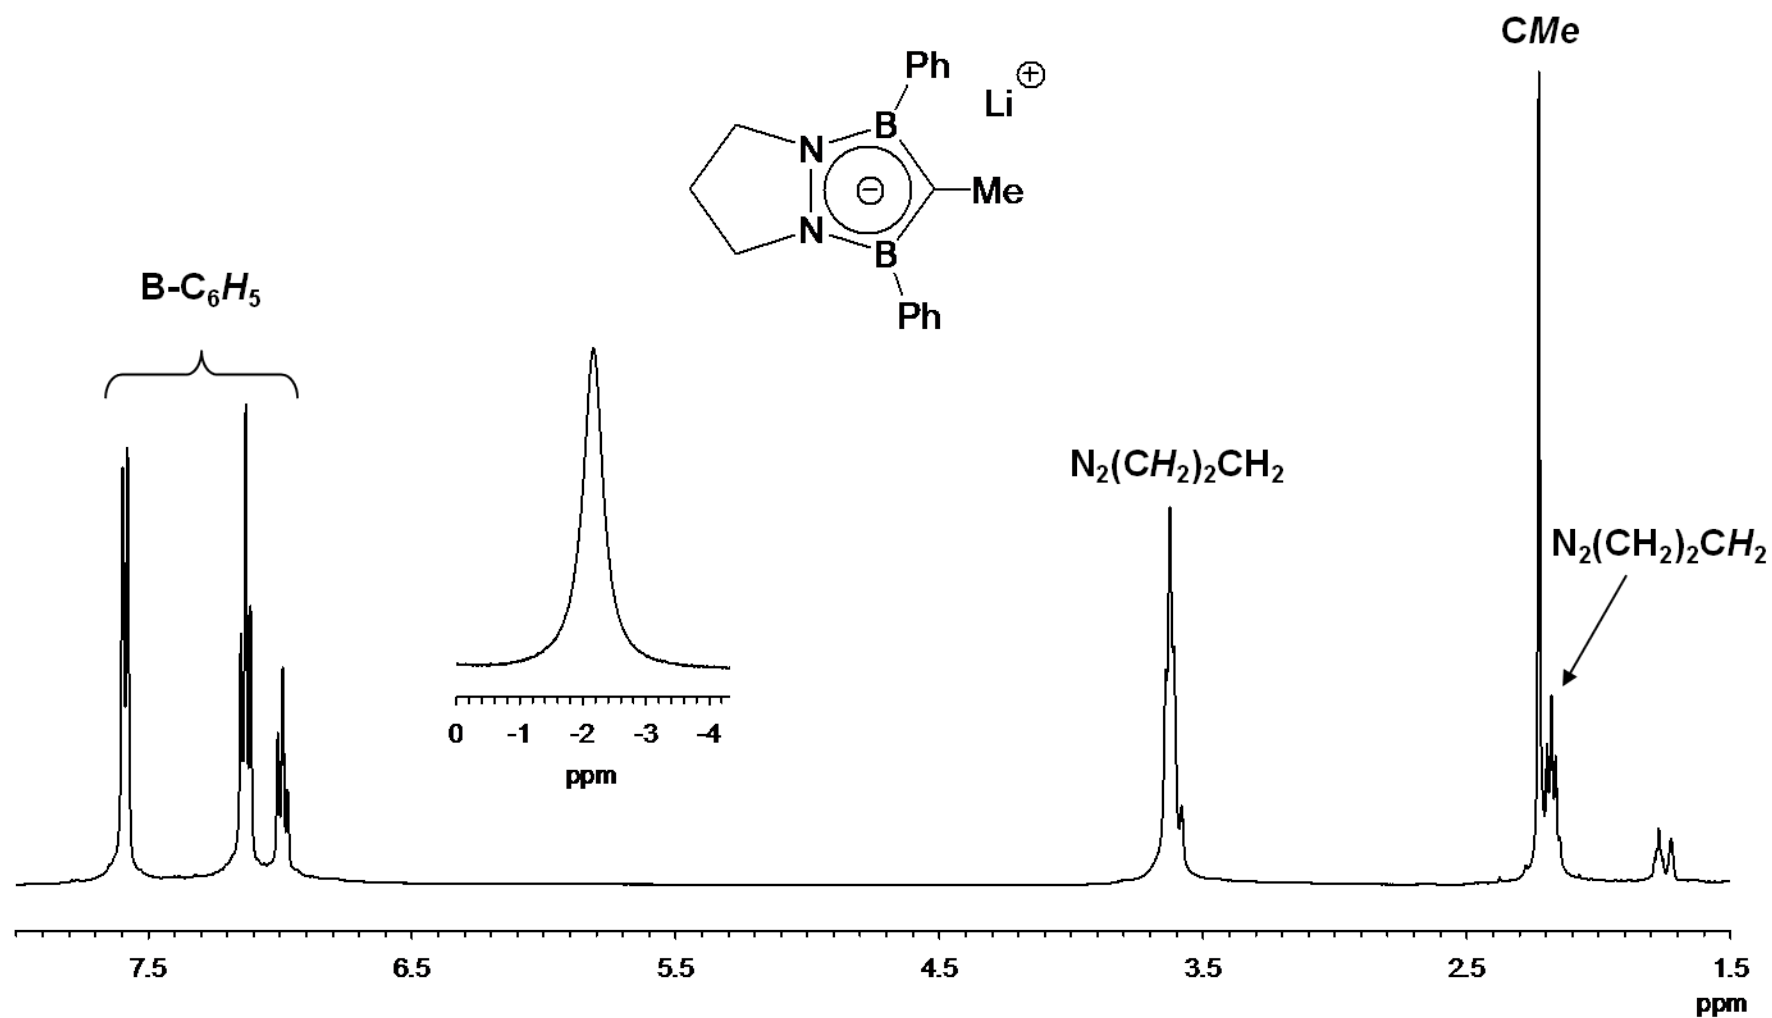

$^{13}\text{C}$  and  $^{11}\text{B}$  NMR Spectra of the 1,2-Pyrazo-3,5-diborolyllithium (**2**) in THF- $d_8$

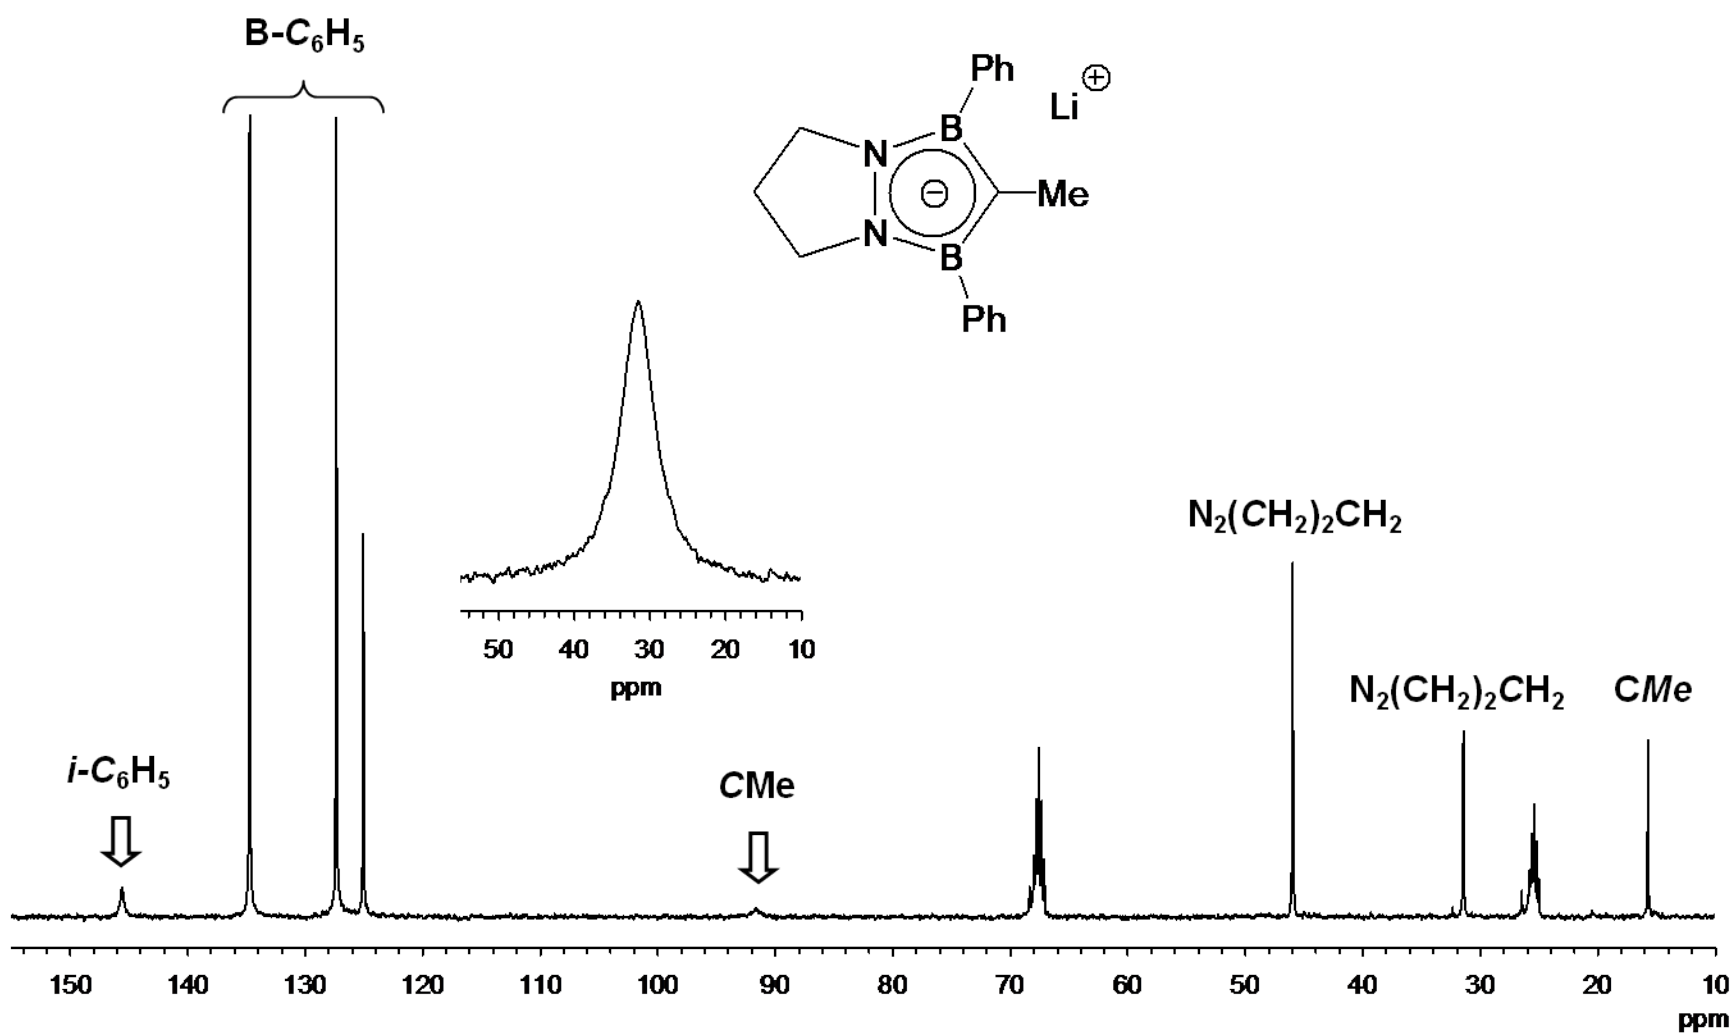

$^1\text{H}$  NMR Spectrum of pentamethylcyclopentadienyl(1,2-pyrazo-3,5-diboroly)ruthenocene (**3**) in  $\text{C}_6\text{D}_6$

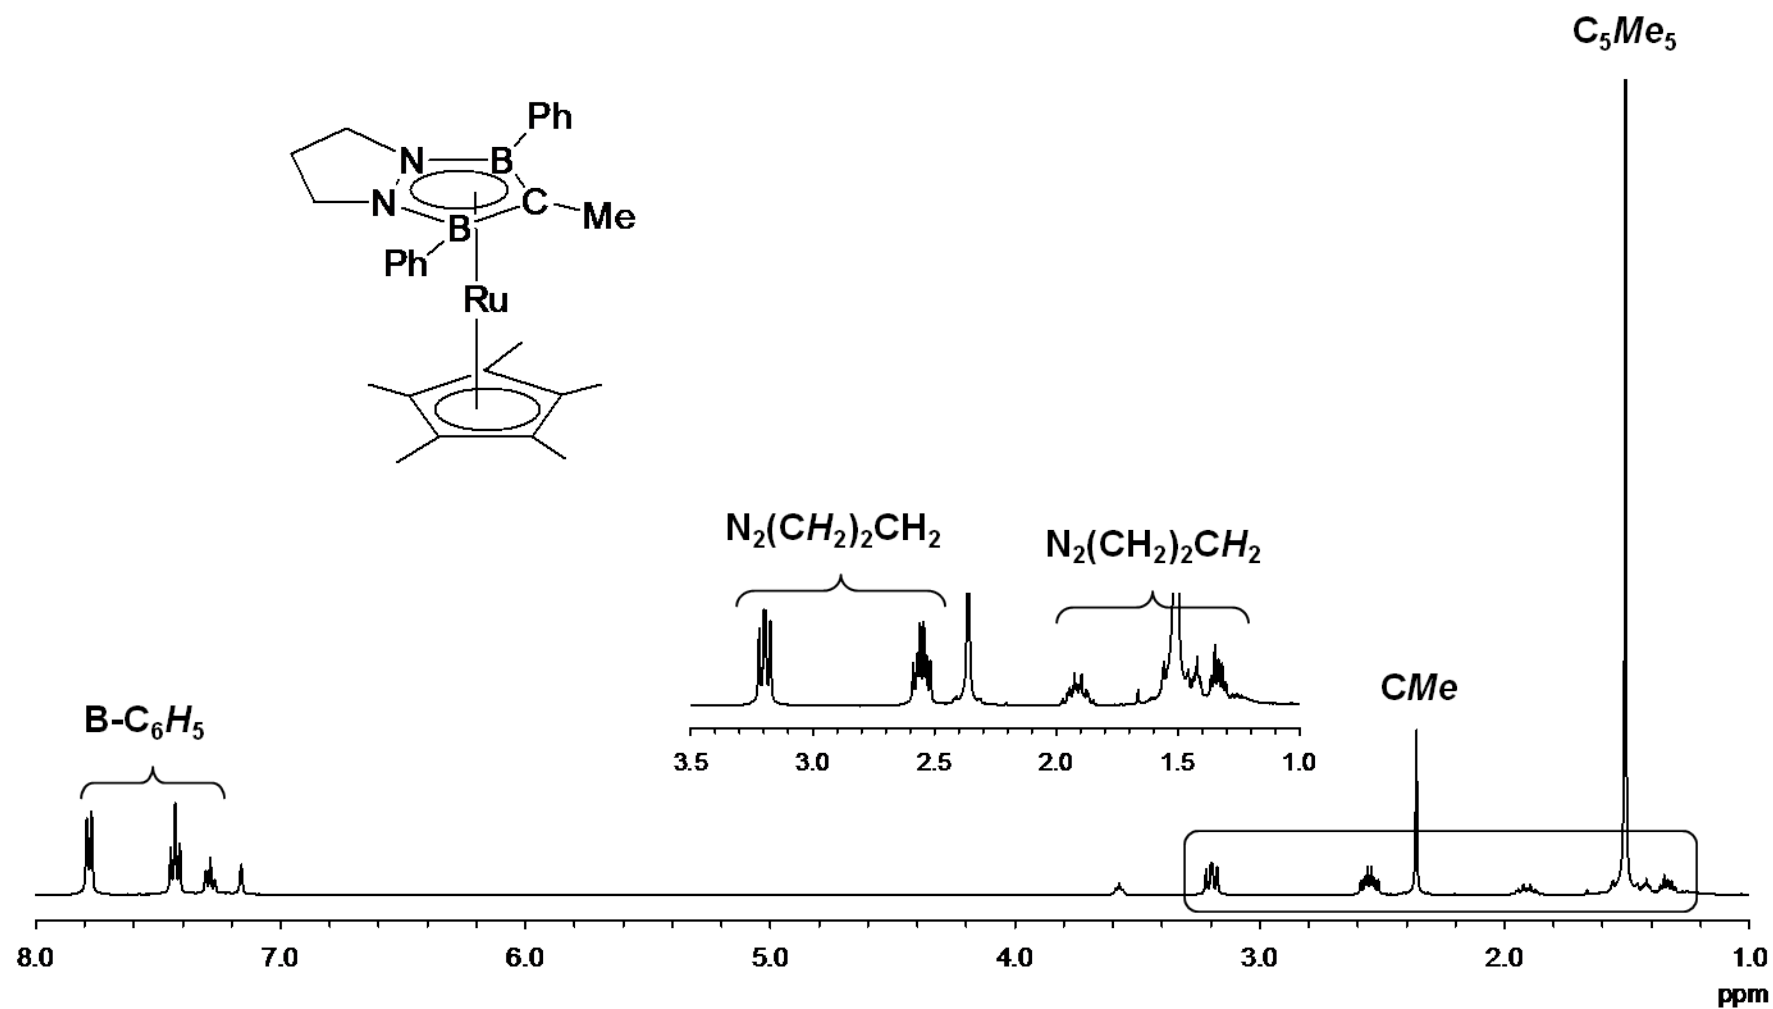

$^{13}\text{C}$  and  $^{11}\text{B}$  NMR Spectra of pentamethylcyclopentadienyl(1,2-pyrazo-3,5-diboroly)ruthenocene (**3**) in  $\text{C}_6\text{D}_6$

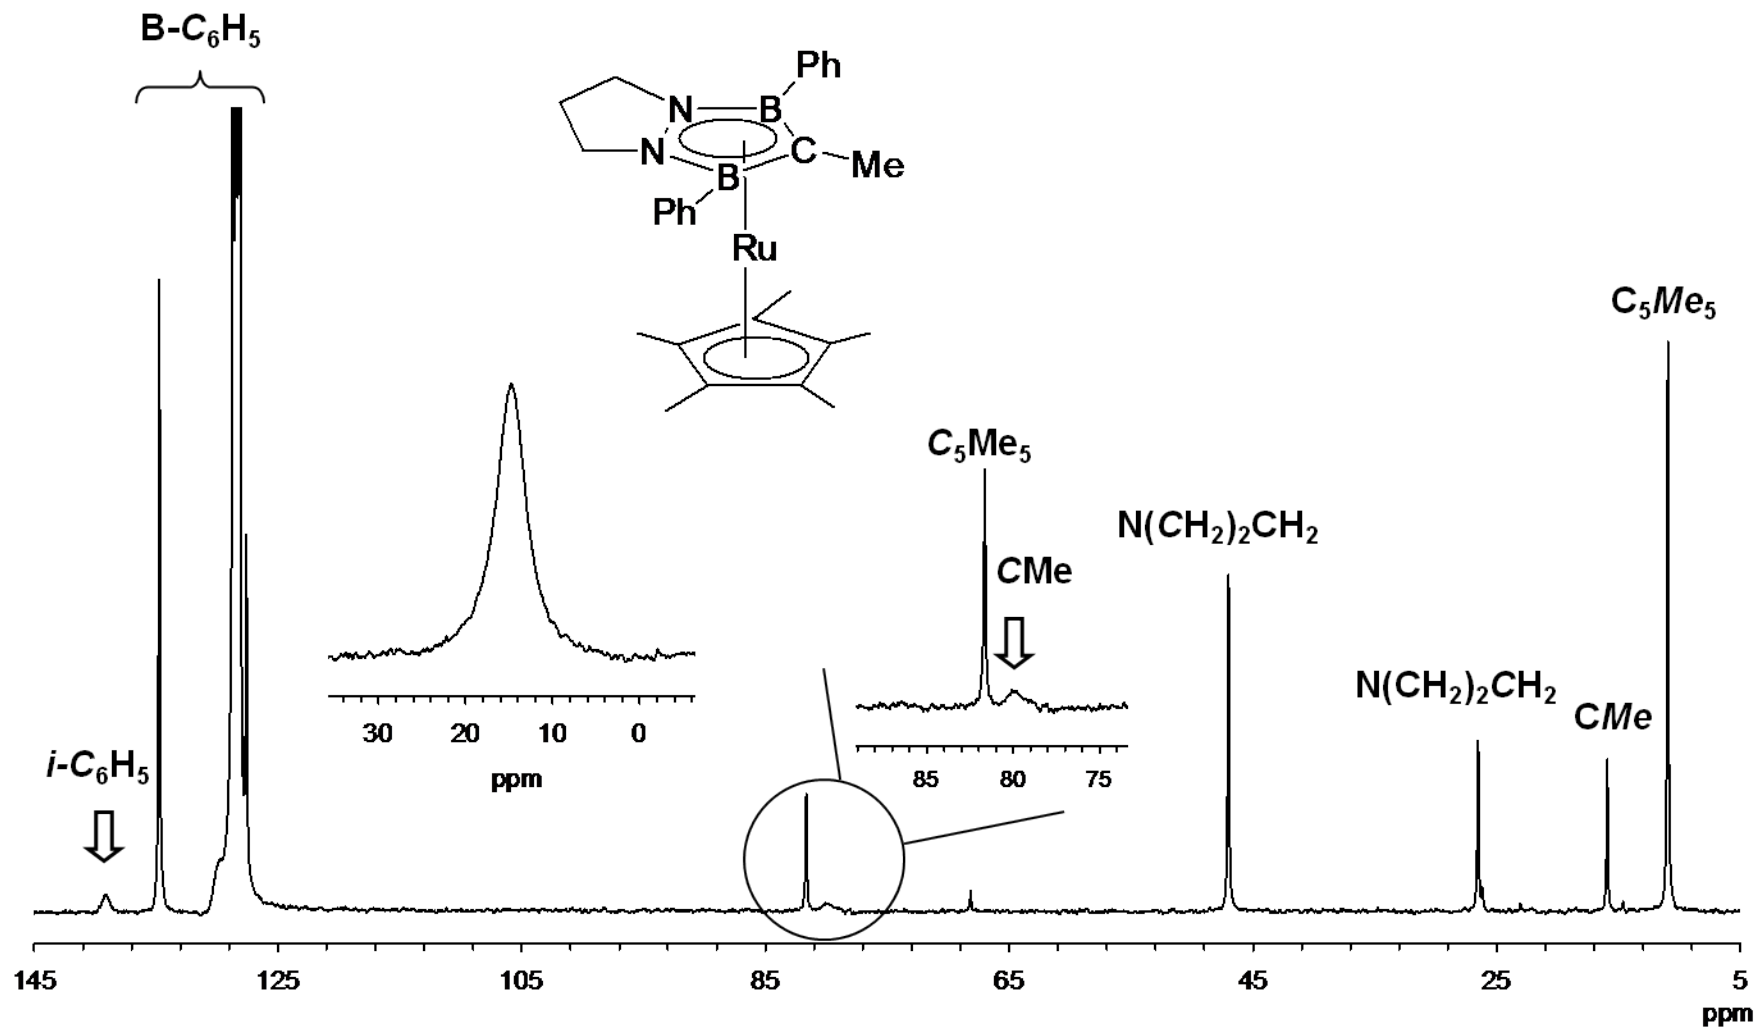



# $^1\text{H}$ NMR Spectrum of the Bis(1,2-pyrazo-3,5-diboroly)ferrocene (**4**) in $\text{CH}_2\text{Cl}_2$

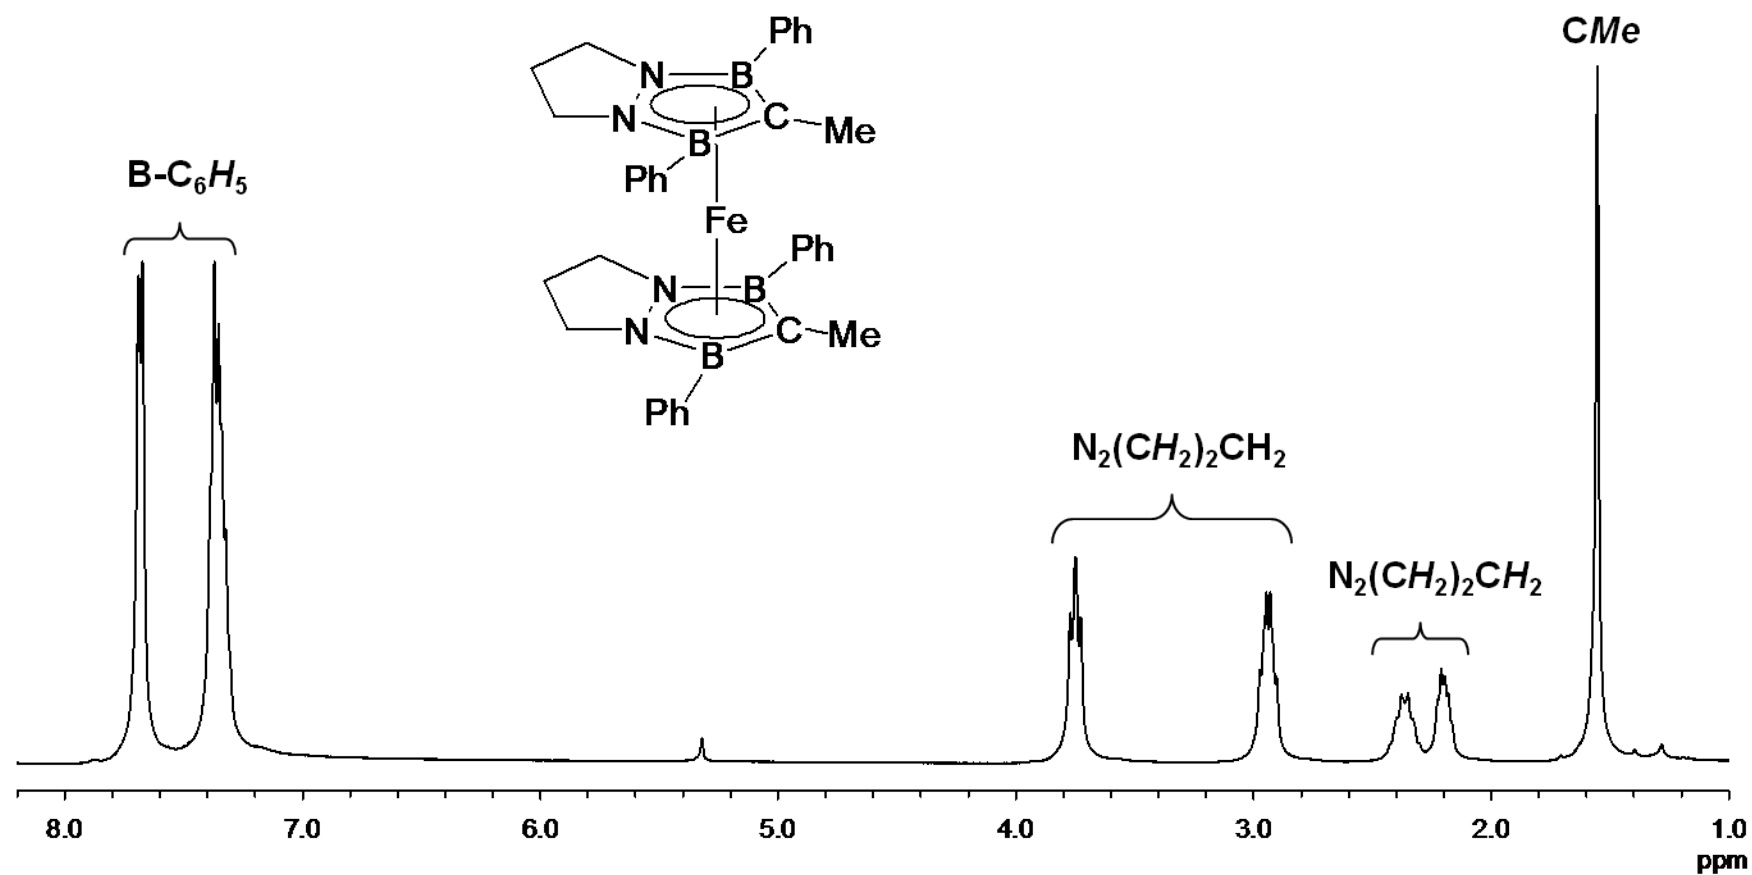

### $^{13}\text{C}$ and $^{11}\text{B}$ NMR Spectra of the Bis(1,2-pyrazo-3,5-diboroly)ferrocene (**4**) in $\text{CH}_2\text{Cl}_2$

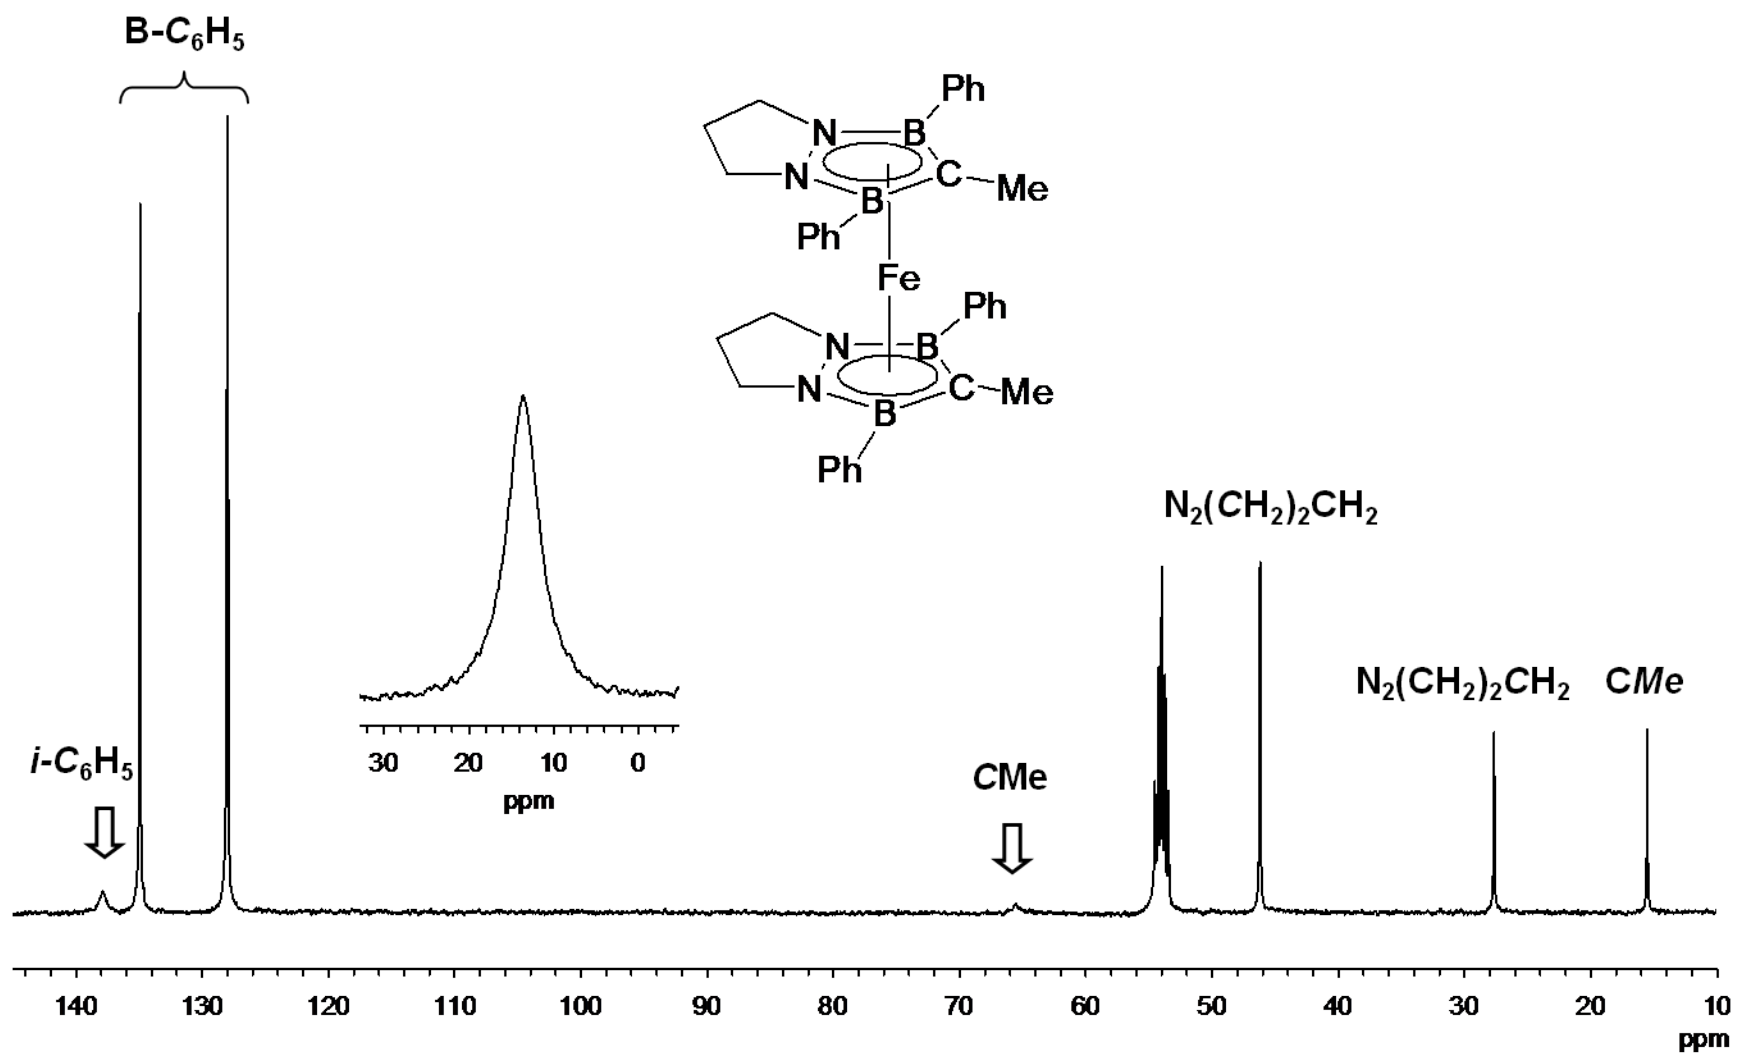

## Computational details for 3 and 4

Molecular structures of various Fe and Ru sandwich complexes were optimized using density functional theory. The PBE1PBE hybrid functional<sup>1</sup> was used in together with the def2-TZVP basis sets.<sup>2</sup> Vertical ionization energies were calculated using the same method-basis set combination and employing the optimized geometries of the neutral complexes. All calculations were performed with the Turbomole 5.10 program package.<sup>3</sup>

1. (a) Perdew, J. P.; Burke, K.; Ernzerhof, M. *Phys. Rev. Lett.* 1996, **77**, 3865. (b) Perdew, J. P.; Burke, K.; Ernzerhof, M. *Phys. Rev. Lett.* 1997, **78**, 1396. (c) Perdew, J. P.; Ernzerhof, M.; Burke, K. *J. Chem. Phys.* 1996, **105**, 9982. (d) Adamo C.; Barone, V. *J. Chem. Phys.* 1999, **110**, 6158.
2. Weigend, F.; Ahlrichs, R. *Phys. Chem. Chem. Phys.* 2005, **7**, 3297.
3. (a) TURBOMOLE, Program Package for *ab initio* Electronic Structure Calculations, Version 5.10; TURBOMOLE GmbH: Karlsruhe, Germany, 2008. (b) Ahlrichs, R.; Bär, M.; Häser, M.; Horn, H; Kölmel, C. *Chem. Phys. Lett.* 1989, **162**, 165.

**Table S1.** Calculated Vertical Ionization Energies of L<sub>2</sub>M (kJ mol<sup>-1</sup>)

| M \ L     | 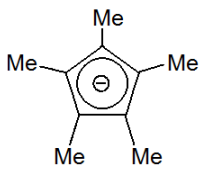 |  |  |  |
|-----------|------------------------------------------------------------------------------------|------------------------------------------------------------------------------------|-------------------------------------------------------------------------------------|--------------------------------------------------------------------------------------|
| <b>Fe</b> | 532                                                                                | 542                                                                                | 531                                                                                 | 532                                                                                  |
| <b>Ru</b> | 620                                                                                | 604                                                                                | 596                                                                                 | 609                                                                                  |
